# Supplementary material
Source: PubMed Central journal article supplement (PMC4524183)
Supplement: JB.00153-15_zjb999093660so1.pdf [file JB.00153-15_zjb999093660so1.pdf]

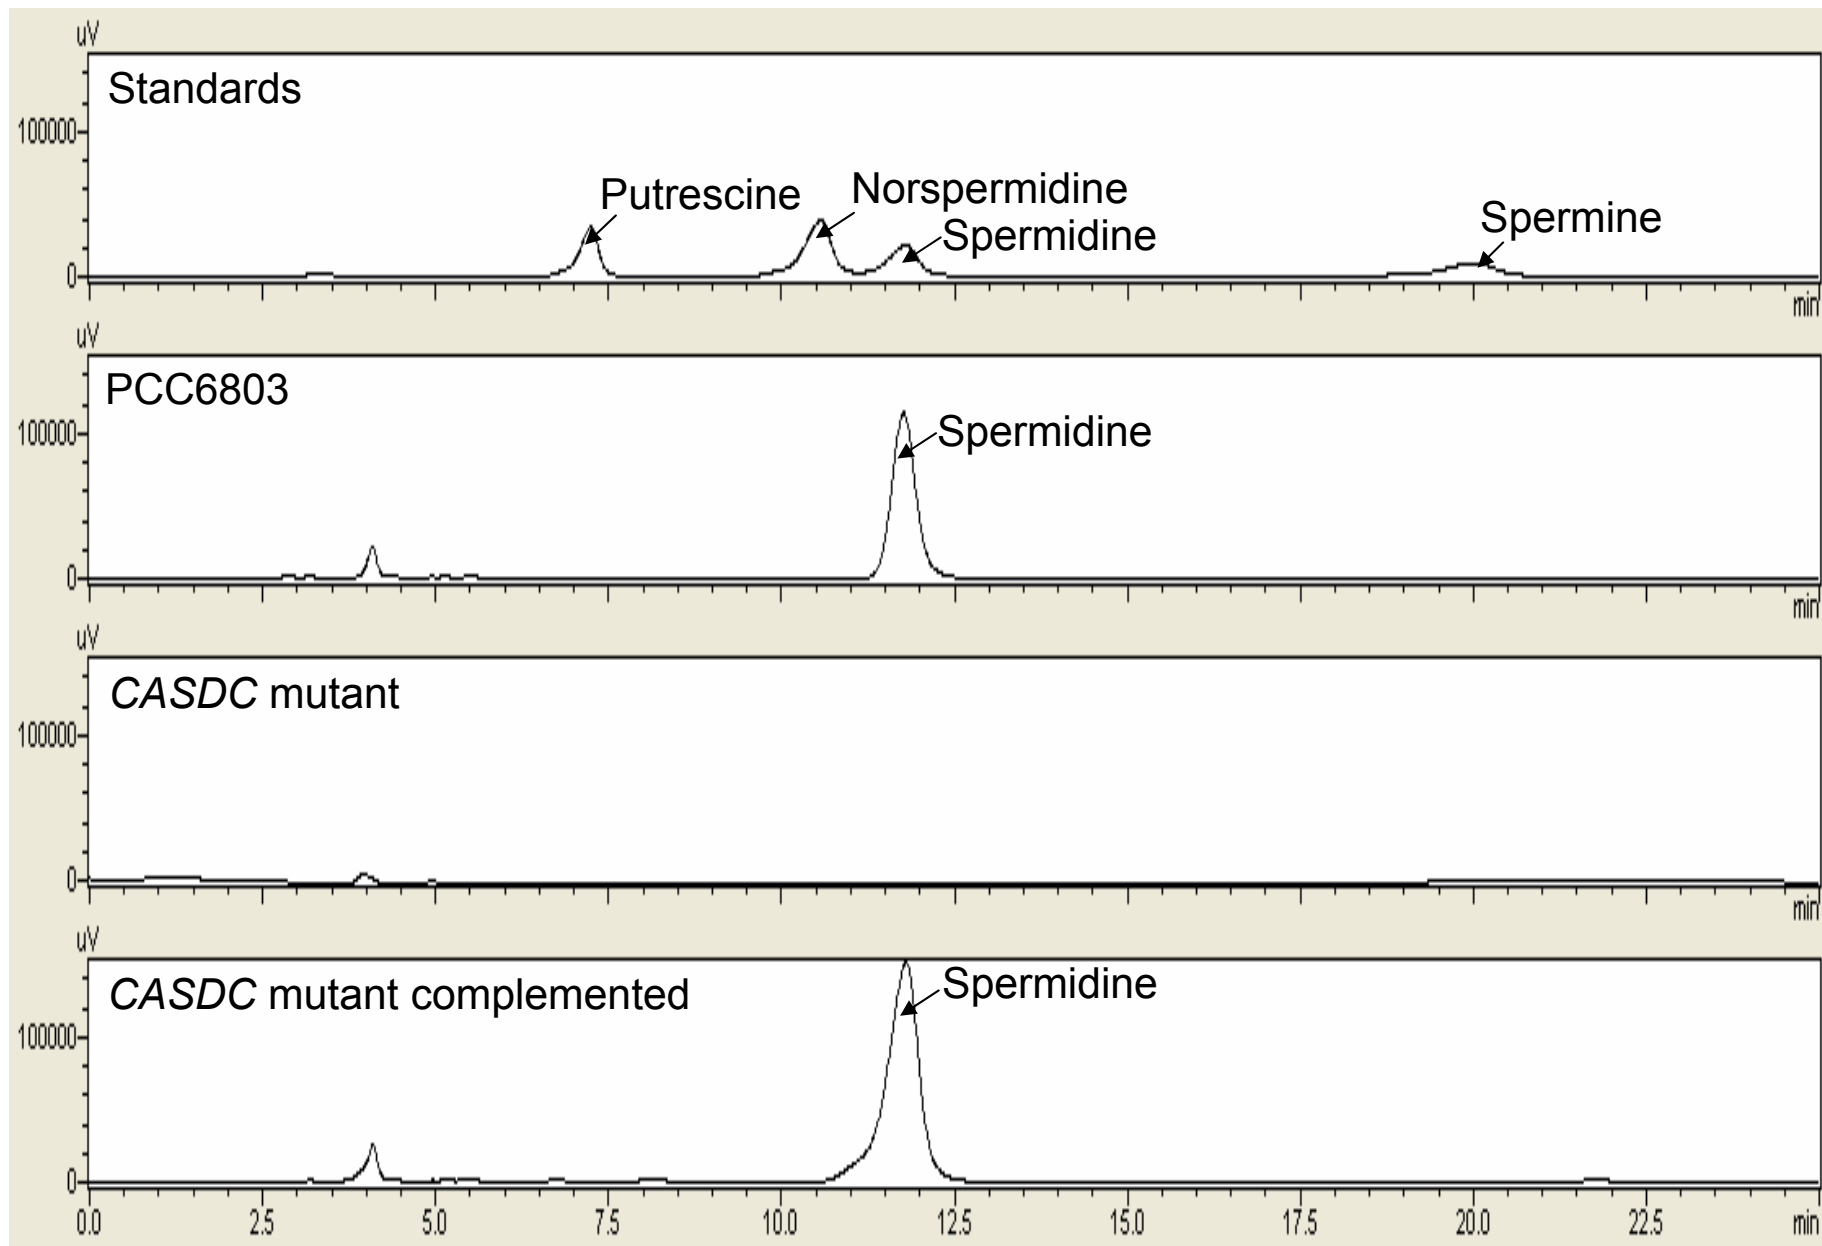

**Fig. S1.** HPLC analysis of polyamines showing the role of *CASDC* in synthesis of spermidine in *Synechocystis* 6803.

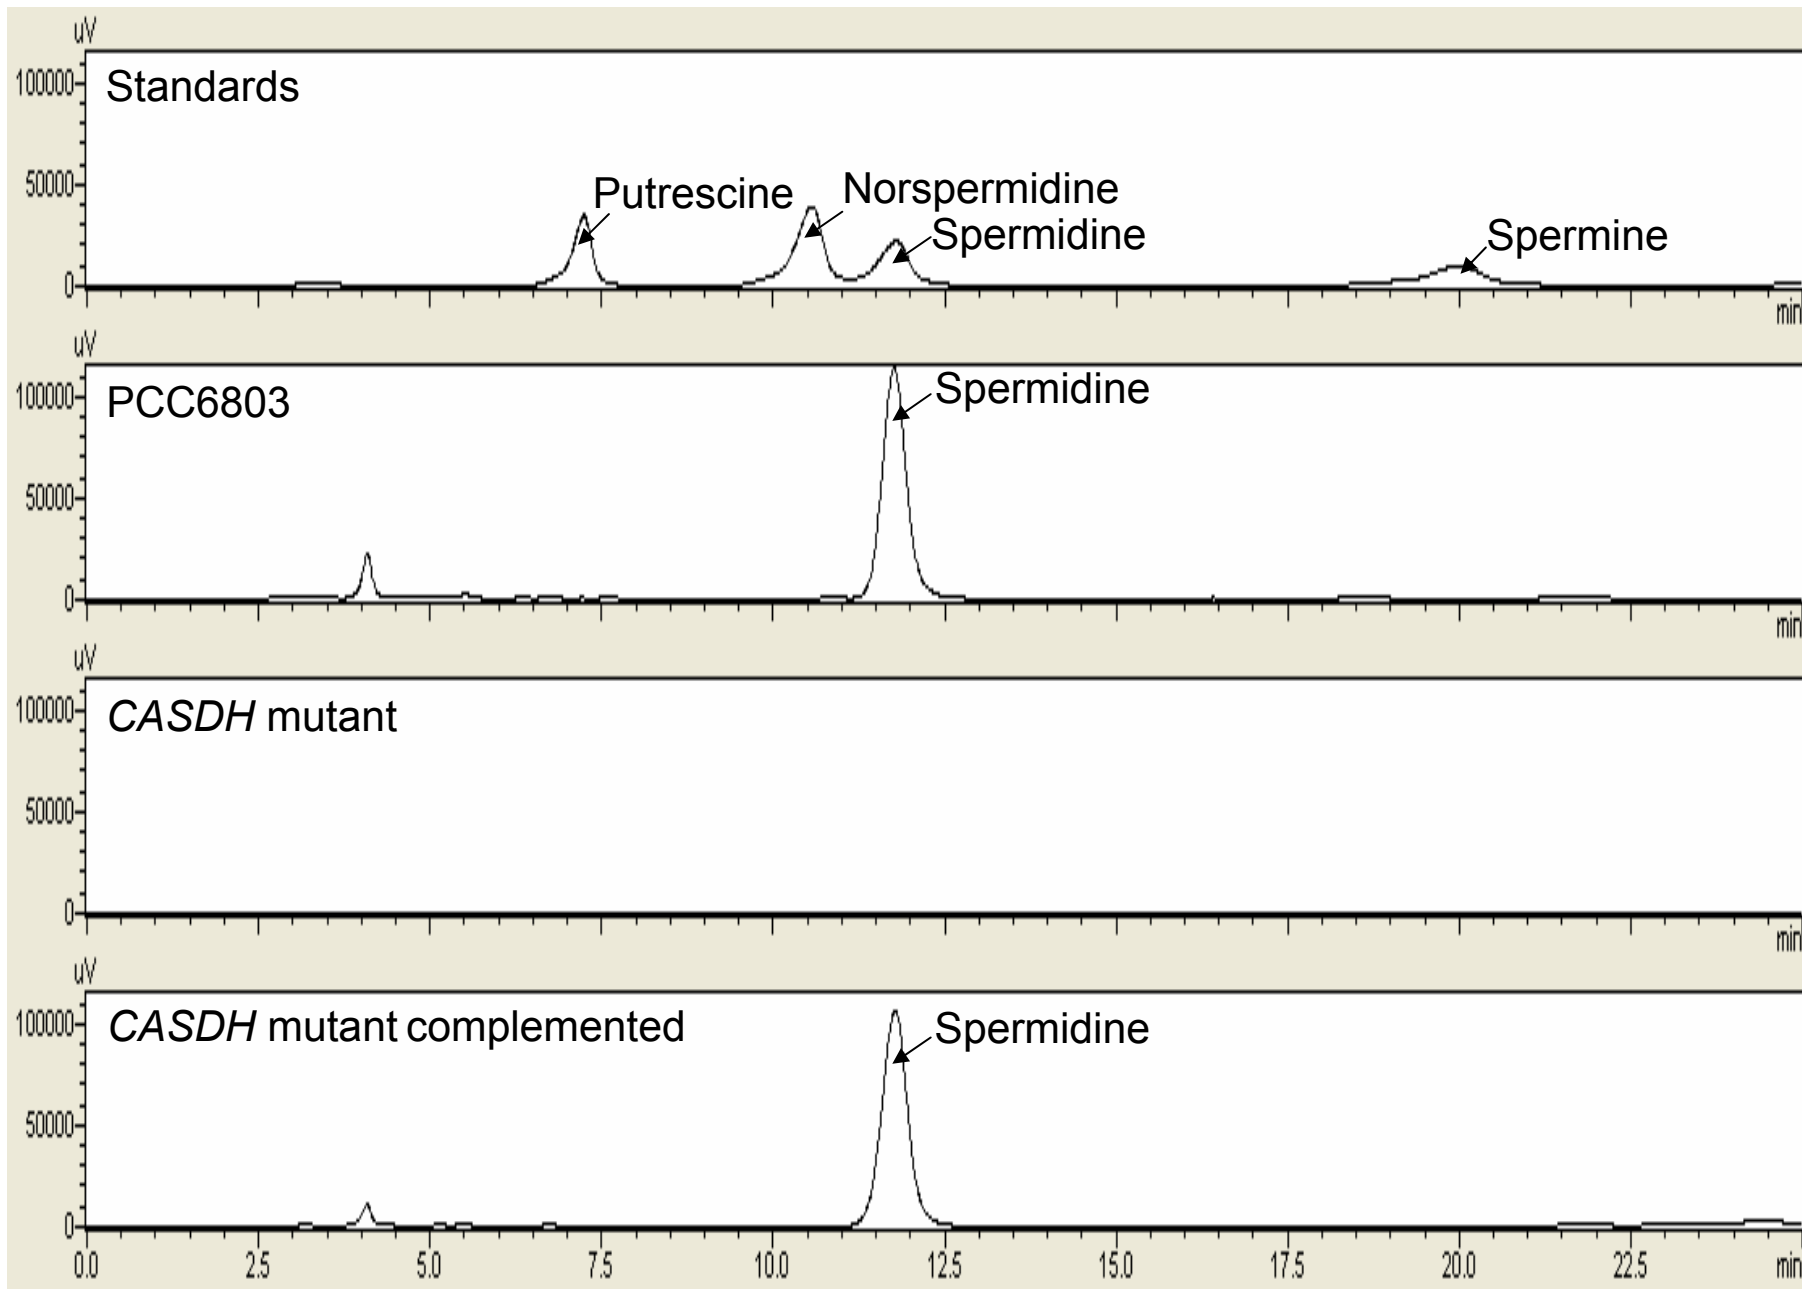

**Fig. S2.** HPLC analysis of polyamines showing the role of *CASDH* in synthesis of spermidine in *Synechocystis* 6803.

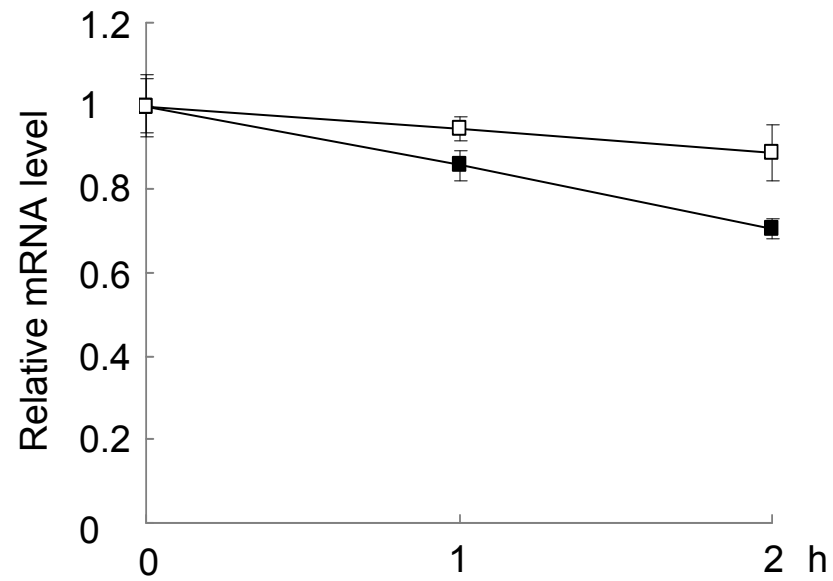

**Fig. S3.** qRT-PCR analysis of *rbp1* mRNA decay in the wild type (solid square) and the *CASDC* mutant (empty square) of *Synechocystis* 6803 under chill-light stress.

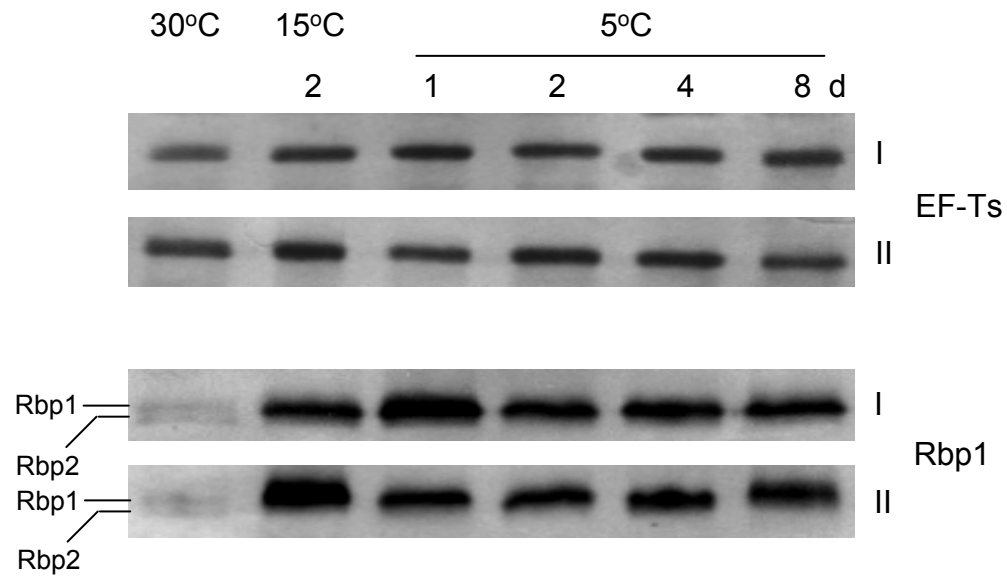

**Fig. S4.** Western blot detection of EF-Ts and Rbp1 in *Synechocystis* 6803::P<sub>CASDC</sub>-lacZ (I) and *Synechocystis* 6803 DRHB2193::P<sub>CASDC</sub>-lacZ (II). DRHB2193, the CASDC mutant.

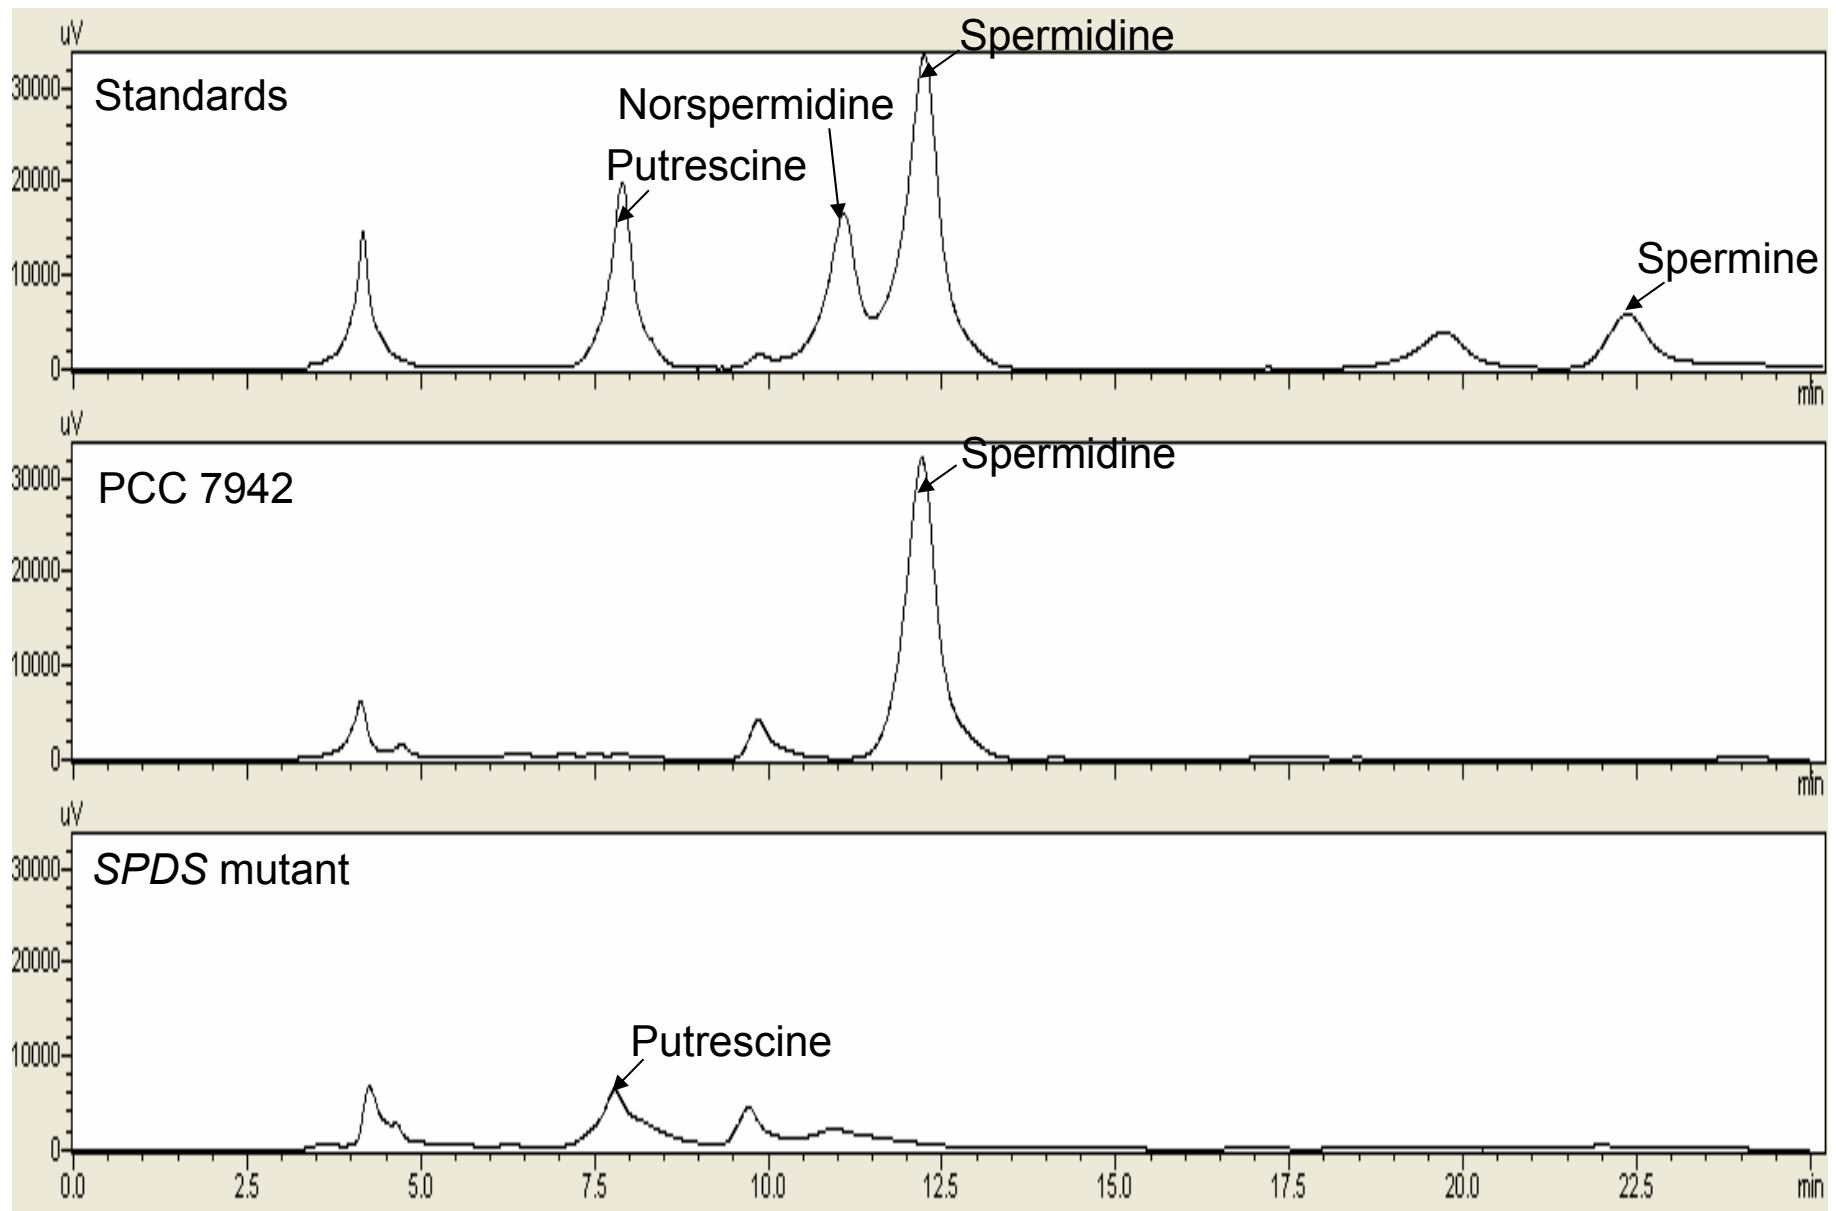

**Fig. S5.** HPLC analysis of polyamines showing the role of *SPDS* in synthesis of spermidine in *Synechococcus* 7942.

Table S1 Plasmids and primers

| Plasmids or primer | Derivation, relevant characteristics, or sequences (5'→3')                                                                                                                                                                                   | Source or reference(s) |
|--------------------|----------------------------------------------------------------------------------------------------------------------------------------------------------------------------------------------------------------------------------------------|------------------------|
| Plasmids           |                                                                                                                                                                                                                                              |                        |
| pHB1117            | Ap <sup>r</sup> , a plasmid containing <i>lacZ</i> from <i>E. coli</i> GM48, cloned into pMD18-T                                                                                                                                             | Gao et al, 2007        |
| pHB1957            | Ap <sup>r</sup> , the PCR fragment containing <i>sll0873</i> , amplified with primers sll0873-1/-2, cloned into pMD18-T                                                                                                                      | This study             |
| pHB2193            | Ap <sup>r</sup> Km <sup>r</sup> , the Km <sup>r</sup> cassette excised with PvuII from pRL446, cloned into NheI-cut and T4 DNA polymerase-blunted pHB1957, interrupting <i>sll0873</i>                                                       | This study             |
| pHB2739            | Ap <sup>r</sup> , the PCR fragment containing P <sub><i>rbcL</i></sub> , amplified with primers prbcL-1/-6, cloned into pMD18-T                                                                                                              | This study             |
| pHB2759            | Ap <sup>r</sup> Sp <sup>r</sup> , Ω cassette excised with DraI from pRL57, cloned into Sall-cut and T4 DNA polymerase-blunted pHB2739, with Ω positioned upstream of P <sub><i>rbcL</i></sub>                                                | This study             |
| pHB2926            | Ap <sup>r</sup> , the PCR fragment containing <i>sll0873</i> , amplified with primers sll0873c-1/-2, cloned into pMD18-T                                                                                                                     | This study             |
| pHB2926a           | Ap <sup>r</sup> Sp <sup>r</sup> , Ω-P <sub><i>rbcL</i></sub> excised with PstI and XbaI from pHB2759, blunted with T4 DNA polymerase, cloned into Sall-cut and T4 DNA polymerase-blunted pHB2926, forming Ω-P <sub><i>rbcL-sll0873</i></sub> | This study             |
| pHB2972            | Ap <sup>r</sup> Sp <sup>r</sup> , Ω-P <sub><i>rbcL-sll0873</i></sub> excised with HindIII and BamHI from pHB2926a, blunted with T4 DNA polymerase, cloned into EcoRI-cut and T4 DNA polymerase-blunted pKW1188                               | This study             |
| pHB4233            | Ap <sup>r</sup> , the PCR fragment containing <i>slr0049</i> , amplified with primers slr0049-1/-2, cloned into pMD18-T                                                                                                                      | This study             |
| pHB4239            | Ap <sup>r</sup> Km <sup>r</sup> , the Km <sup>r</sup> cassette excised with PvuII from pRL446, cloned into NcoI-cut and T4 DNA polymerase-blunted pHB4233, interrupting <i>slr0049</i>                                                       | This study             |
| pHB4289            | Ap <sup>r</sup> , the PCR fragment containing P <sub><i>sll0873</i></sub> , amplified with primers sll0873p-1/-2, cloned into pMD18-T                                                                                                        | This study             |
| pHB4311            | Ap <sup>r</sup> Sp <sup>r</sup> , the Ω cassette excised with DraI from pRL57, cloned into XbaI-cut and T4 DNA polymerase-blunted pHB4289, with Ω positioned upstream of P <sub><i>sll0873</i></sub>                                         | This study             |
| pHB4321            | Ap <sup>r</sup> Sp <sup>r</sup> , Ω-P <sub><i>sll0873</i></sub> excised with Sall and BamHI from pHB4311, cloned into the BglI-cut and T4 DNA polymerase-blunted pHB1117, forming Ω-P <sub><i>sll0873-lacZ</i></sub>                         | This study             |
| pHB4324            | Ap <sup>r</sup> Sp <sup>r</sup> , Ω-P <sub><i>sll0873-lacZ</i></sub> excised with BamHI and                                                                                                                                                  | This study             |

---

|         |                                                                                                                                                                                                                    |                                     |
|---------|--------------------------------------------------------------------------------------------------------------------------------------------------------------------------------------------------------------------|-------------------------------------|
|         | HindIII from pHB4321, blunted with T4 DNA polymerase, cloned into EcoRI-cut and T4 DNA polymerase-blunted pKW1188                                                                                                  |                                     |
| pHB4740 | Ap <sup>r</sup> , the PCR fragment containing P <sub>slr0049-slr0049</sub> , amplified with primers slr0049c-1/-2, cloned into pMD18-T                                                                             | This study                          |
| pHB4744 | Ap <sup>r</sup> Sp <sup>r</sup> , the Ω cassette excised with DraI from pRL57, cloned into SalI-cut and T4 DNA polymerase-blunted pHB4740, with Ω positioned upstream of P <sub>slr0049-slr0049</sub>              | This study                          |
| pHB4768 | Ap <sup>r</sup> Sp <sup>r</sup> , the Ω-P <sub>slr0049-slr0049</sub> fragment excised with PstI and SacI from pHB4744, blunted with T4 DNA polymerase, cloned into EcoRI-cut and T4 DNA polymerase-blunted pKW1188 | This study                          |
| pHB5449 | Ap <sup>r</sup> , the PCR fragment containing <i>Synpcc7942_0628</i> , amplified with primers <i>Synpcc7942_0628-1/-2</i> , cloned into pMD18-T                                                                    | This study                          |
| pHB5450 | Ap <sup>r</sup> Km <sup>r</sup> , the Km <sup>r</sup> cassette excised with PvuII from pRL446, cloned into BssHII-cut and T4 DNA polymerase-blunted pHB5449, interrupting <i>Synpcc7942_0628</i>                   | This study                          |
| pKW1188 | Ap <sup>r</sup> Km <sup>r</sup> , a plasmid bearing a neutral integrative platform of <i>Synechocystis</i> 6803                                                                                                    | Williams 1988; Gao and Xu, 2009     |
| pMD18-T | Ap <sup>r</sup> , a cloning vector                                                                                                                                                                                 | Takara, Japan                       |
| pRL57   | Km <sup>r</sup> Sm <sup>r</sup> Sp <sup>r</sup> , a pDU1-based plasmid containing the spectinomycin/streptomycin resistance cassette Ω                                                                             | Elhai and Wolk, 1988                |
| pRL446  | Ap <sup>r</sup> Km <sup>r</sup> , a plasmid containing a Km <sup>r</sup> cassette                                                                                                                                  | NCBI GenBank accession no. EU346690 |

Primers (5'→3')

|              |                        |
|--------------|------------------------|
| lacZqRT-3    | ACGGATTCACTGGCCGTC     |
| lacZqRT-4    | CAAAGCGCCATTCGCCAT     |
| prbcL-1      | CCGATGAAGTGGTGGAGCA    |
| prbcL-6      | GGTCAGTCCTCCATAAACATTG |
| rnpBn-1      | GTTAGGGAGGGAGTTGCGG    |
| rnpBn-2      | AAGAGAGTTAGTCGTAAGCCG  |
| rnpB-qRT-1   | CGGTTGGAAGCAAGGTCG     |
| rnpB-qRT-2   | AAGAGAGTTAGTCGTAAGCCG  |
| sll0517qRT-1 | ATAGCTTTTACGACCGCC     |
| sll0517qRT-2 | CGGGAAACTGGTCGCATG     |
| sll0873-1    | GACTTGATTGGGCTACTGTTTT |
| sll0873-2    | ACCGAGTATGACCTGTGGTTC  |
| sll0873c-1   | GACTTGATTGGGCTACTGTTTT |

---

---

|                   |                         |
|-------------------|-------------------------|
| sll0873c-2        | ACCGAGTATGACCTGTGGTTC   |
| sll0873n-1        | GCATCGTTATCGGGAATC      |
| sll0873n-2        | ACCAAAGGTACGCCACAG      |
| sll0873p-1        | AAGACGACGGCCTCTGCTCC    |
| sll0873p-2        | AAGATCGGTCTGCACGGG      |
| sll0873qRT-5      | AACCCCAGGTTATCCAGC      |
| sll0873qRT-6      | CCCTGCTAACCCTGACCGCAA   |
| sll0873up-2       | CCCTGCTAACCCTGACCGCA    |
| sll0873up-7       | AAATTCCCTCCGCCGCCAG     |
| sll1261qRT-3      | ACCAAGGTTAAAGCGGAT      |
| sll1261qRT-4      | AAAAGATTGTCCAAGGGC      |
| sll1818qRT-3      | CTCAATCACCTCCTCTGC      |
| sll1818qRT-4      | AGGACGAGGTCAATCCGG      |
| slr0049-1         | GCATGATTGTGGGAGCTGGGGGC |
| slr0049-2         | GCCGTTGACTACTTCGTGCCA   |
| slr0049c-1        | CCGTGACGAATAAGGTAAA     |
| slr0049c-2        | CGGCAATGTA ACTGGACTA    |
| slr0338qRT-3      | TGGGGTGGGCAATAATGGG     |
| slr0338qRT-4      | CCGCCACACAAACCGCAT      |
| Synpcc7942_0628-1 | AGGCAAGTGGAGTTTGAGCA    |
| Synpcc7942_0628-2 | CATTGGAAGAGCCTCCGG      |

---

## REFERENCES

- Elhai J, Wolk CP. 1988. A versatile class of positive-selection vectors based on the nonviability of palindrome-containing plasmids that allows the cloning into long polylinkers. *Gene* **68**:119-138.
- Gao H, Tang Q, Xu X. 2007. Construction of copper-induced gene expression platform in *Synechocystis* 6803. *Acta Hydrobiol Sin.* **31**: 240-243.
- Gao H, Xu X. 2009. Depletion of Vipp1 in *Synechocystis* sp. PCC 6803 affects photosynthetic activity prior to the loss of thylakoid membranes. *FEMS Microbiol Lett.* **292**: 63-70.
- Williams JGK. 1988. Construction of specific mutations in photosystem II photosynthetic reaction center by genetic engineering methods in *Synechocystis* 6803. *Methods Enzymol.* **167**: 766-778.



Table S2 Genes regulated in *Synechocystis* 6803 preconditioned at 15°C and exposed to chill (4°C) and light

| ORF*                        | Gene             | Product                                                                       | 4°C/15°C     |
|-----------------------------|------------------|-------------------------------------------------------------------------------|--------------|
| Up-regulated                |                  |                                                                               |              |
| <i>slr1254</i>              | <i>crtD</i>      | phytoene dehydrogenase                                                        | 5.900±3.470  |
| <i>ssl0452</i>              | <i>nblA1</i>     | phycobilisome degradation protein NblA                                        | 5.721±2.813  |
| <i>slr0150</i>              | <i>petF, fdx</i> | ferredoxin, petF-like protein                                                 | 10.457±6.808 |
| <i>ssl3044</i>              |                  | probable ferredoxin                                                           | 8.823±2.579  |
| <i>sll0741</i>              |                  | pyruvate flavodoxin oxidoreductase                                            | 3.604±1.726  |
| <i>ssr2061</i>              |                  | glutaredoxin                                                                  | 3.218±0.492  |
| <i>slr1300</i>              |                  | similar to 2-octaprenyl-6-methoxyphenol hydroxylase                           | 3.344±1.797  |
| <i>slr1609</i>              |                  | long-chain-fatty-acid CoA ligase                                              | 3.250 ±0.734 |
| <i>slr1516</i> <sup>b</sup> | <i>sodB</i>      | superoxide dismutase                                                          | 3.812±1.742  |
| <i>slr0798</i>              | <i>ziaA</i>      | zinc-transporting P-type ATPase (zinc efflux pump) involved in zinc tolerance | 3.833±0.695  |
| <i>slr0324</i> <sup>a</sup> |                  | probable oligopeptides ABC transporter permease protein                       | 2.623±0.621  |
| <i>sll1154</i> <sup>a</sup> |                  | putative antibiotic efflux protein                                            | 2.813±0.585  |
| <i>sll0086</i>              |                  | putative arsenical pump-driving ATPase                                        | 3.508±0.495  |
| <i>slr1545</i> <sup>b</sup> | <i>sigG</i>      | RNA polymerase ECF-type (group 3) sigma factor                                | 2.327±0.466  |
| <i>slr1105</i> <sup>b</sup> |                  | GTP-binding protein TypA/BipA homolog                                         | 2.841±0.068  |
| <i>slr1974</i>              |                  | GTP binding protein                                                           | 3.200±0.913  |
| <i>sll1967</i> <sup>a</sup> |                  | probable RNA methyltransferase                                                | 3.405±1.192  |
| <i>slr0083</i> <sup>a</sup> | <i>crhR</i>      | RNA helicase Light                                                            | 3.962±1.070  |
| <i>slr1604</i> <sup>b</sup> | <i>ftsH</i>      | cell division protein FtsH                                                    | 2.621±0.794  |
| <i>sll1695</i>              | <i>pilA2</i>     | pilin polypeptide PilA2                                                       | 4.462±1.773  |
| <i>slr0804</i> <sup>a</sup> |                  | probable D-alanyl-D-alanine carboxypeptidase                                  | 3.949±2.227  |
| <i>sll0873</i> <sup>a</sup> |                  | carboxynorspermidine decarboxylase                                            | 10.795±6.352 |
| <i>slr0550</i>              | <i>dapA</i>      | dihydrodipicolinate synthase                                                  | 2.471±0.265  |
| <i>slr0611</i>              | <i>sds</i>       | solaneyl diphosphate synthase                                                 | 3.975±0.707  |
| <i>slr0406</i>              | <i>pyrC</i>      | dihydroorotase                                                                | 3.054±1.688  |
| <i>slr1675</i>              | <i>hypA1</i>     | putative hydrogenase expression/formation protein HypA1                       | 3.395±0.787  |
| <i>slr0756</i>              | <i>kaiA</i>      | circadian clock protein KaiA homolog                                          | 2.701 ±1.045 |
| <i>sll0296</i>              |                  | hypothetical protein                                                          | 3.080±1.172  |
| <i>sll0414</i>              |                  | hypothetical protein                                                          | 2.878 ±1.299 |
| <i>sll0549</i>              |                  | hypothetical protein                                                          | 4.537±1.632  |
| <i>sll1022</i>              |                  | hypothetical protein                                                          | 4.187 ±3.057 |
| <i>sll1130</i>              |                  | unknown protein                                                               | 2.286±0.161  |

|                |                  |                                                                                      |                |
|----------------|------------------|--------------------------------------------------------------------------------------|----------------|
| <i>sll1541</i> |                  | hypothetical protein                                                                 | 8.003±4.248    |
| <i>sll1863</i> |                  | unknown protein                                                                      | 14.799±5.957   |
| <i>sll1884</i> |                  | hypothetical protein                                                                 | 3.630±0.580    |
| <i>sll1911</i> |                  | hypothetical protein                                                                 | 4.055±1.046    |
| <i>sll1951</i> |                  | unknown protein                                                                      | 2.949±0.210    |
| <i>slr0148</i> |                  | hypothetical protein                                                                 | 4.535±0.744    |
| <i>slr0151</i> |                  | unknown protein                                                                      | 5.091±2.139    |
| <i>slr0642</i> |                  | hypothetical protein                                                                 | 4.422±0.960    |
| <i>slr0959</i> |                  | hypothetical protein                                                                 | 4.562 ±1.944   |
| <i>slr1413</i> |                  | hypothetical protein                                                                 | 3.144±0.798    |
| <i>slr1436</i> |                  | unknown protein                                                                      | 3.232±0.843    |
| <i>slr1674</i> |                  | hypothetical protein                                                                 | 5.393±1.215    |
| <i>slr1687</i> |                  | hypothetical protein                                                                 | 9.695±1.950    |
| <i>slr1946</i> |                  | hypothetical protein                                                                 | 2.080±0.014    |
| <i>ssl2162</i> |                  | unknown protein                                                                      | 5.139±0.485    |
| <i>ssl3177</i> |                  | hypothetical protein                                                                 | 4.143±0.716    |
| <i>ssl3769</i> |                  | unknown protein                                                                      | 3.530±1.041    |
| <i>ssr2016</i> |                  | hypothetical protein                                                                 | 23.357 ±17.434 |
| Down-regulated |                  |                                                                                      |                |
| <i>sll0520</i> | <i>ndhI</i>      | NADH dehydrogenase subunit NdhI                                                      | 0.316 ±0.068   |
| <i>sll1796</i> | <i>petJ</i>      | cytochrome c553                                                                      | 0.282 ±0.127   |
| <i>sll0662</i> |                  | 4Fe-4S type iron-sulfur protein                                                      | 0.208 ±0.092   |
| <i>sll0248</i> | <i>isiB</i>      | flavodoxin                                                                           | 0.032 ±0.020   |
| <i>slr1735</i> | <i>bgtA</i>      | ATP-binding subunit of the ABC-type Bgt permease for basic amino acids and glutamine | 0.435 ±0.073   |
| <i>sll1450</i> | <i>nrtA</i>      | nitrate/nitrite transport system substrate-binding protein                           | 0.133 ±0.043   |
| <i>sll1451</i> | <i>nrtB</i>      | nitrate/nitrite transport system permease protein                                    | 0.273 ±0.049   |
| <i>slr0898</i> | <i>nirA</i>      | ferredoxin-nitrite reductase                                                         | 0.135 ±0.029   |
| <i>sll0771</i> | <i>glcP, gtr</i> | glucose transport protein                                                            | 0.208 ±0.164   |
| <i>slr1200</i> |                  | urea transport system permease protein                                               | 0.296 ±0.027   |
| <i>slr0042</i> |                  | probable porin; major outer membrane protein                                         | 0.282 ±0.070   |
| <i>slr0043</i> | <i>cmpC</i>      | bicarbonate transport system ATP-binding protein                                     | 0.211 ±0.124   |
| <i>sll1271</i> |                  | probable porin; major outer membrane protein                                         | 0.303 ±0.119   |
| <i>sll1550</i> |                  | probable porin; major outer membrane protein                                         | 0.342 ±0.087   |
| <i>sll1291</i> |                  | two-component response regulator PatA subfamily                                      | 0.321 ±0.030   |
| <i>sll1292</i> |                  | two-component response regulator CheY subfamily                                      | 0.284 ±0.024   |
| <i>sll1546</i> | <i>ppx</i>       | exopolyphosphatase                                                                   | 0.318 ±0.016   |
| <i>sll0220</i> | <i>glmS</i>      | L-glutamine:D-fructose-6-P amidotransferase                                          | 0.399 ±0.081   |

|                |               |                                                    |              |
|----------------|---------------|----------------------------------------------------|--------------|
| <i>slr1830</i> | <i>phaC</i>   | poly (3-hydroxyalkanoate) synthase                 | 0.290 ±0.117 |
| <i>slr0899</i> | <i>cynS</i>   | cyanate lyase                                      | 0.225 ±0.176 |
| <i>slr1853</i> |               | carboxymuconolactone decarboxylase                 | 0.293 ±0.172 |
| <i>sll1869</i> |               | probable dioxygenase, Rieske iron-sulfur component | 0.319 ±0.203 |
| <i>slr2017</i> | <i>pilA11</i> | type IV pilin-like protein, essential for motility | 0.396 ±0.077 |
| <i>sll1533</i> | <i>pilT2</i>  | twitching mobility protein                         | 0.290 ±0.137 |
| <i>sll1242</i> |               | hypothetical protein                               | 0.443 ±0.222 |
| <i>sll0023</i> |               | hypothetical protein                               | 0.271 ±0.063 |
| <i>sll0149</i> |               | hypothetical protein                               | 0.430 ±0.050 |
| <i>sll0249</i> |               | hypothetical protein                               | 0.103 ±0.102 |
| <i>sll0327</i> |               | unknown protein                                    | 0.307 ±0.241 |
| <i>sll1049</i> |               | hypothetical protein                               | 0.430 ±0.050 |
| <i>sll1119</i> |               | hypothetical protein                               | 0.202 ±0.129 |
| <i>slr0060</i> |               | unknown protein                                    | 0.293 ±0.051 |
| <i>slr0453</i> |               | hypothetical protein                               | 0.252 ±0.163 |
| <i>slr0869</i> |               | hypothetical protein                               | 0.285 ±0.098 |
| <i>slr1391</i> |               | unknown protein                                    | 0.318 ±0.182 |
| <i>slr1484</i> |               | unknown protein                                    | 0.237 ±0.214 |
| <i>slr1854</i> |               | unknown protein                                    | 0.202 ±0.095 |
| <i>slr1957</i> |               | hypothetical protein                               | 0.261 ±0.032 |
| <i>slr2003</i> |               | hypothetical protein                               | 0.353 ±0.146 |

\* *Synechocystis* 6803 mutants were constructed by inserting a kanamycin-resistance cassette into ORFs denoted with a or b. a, completely segregated; b, not segregated.
